# Supplementary material for: DFT vs. TDDFT vs. TDA to simulate phosphorescence spectra of Pt- and Ir-based complexes
Source: Royal Society of Chemistry journal article supplement (doi:10.1039/d0dt03614e), 2020-12-09
Supplement: d0dt03614e1.pdf [file d0dt03614e1.pdf]

## Supplementary Information

# DFT *vs.* TDDFT *vs.* TDA to simulate phosphorescence spectra of Pt- and Ir-based complexes

Romain Schira<sup>a</sup> and Camille Latouche\*<sup>a</sup>

<sup>a</sup> *Université de Nantes, CNRS, Institut des Matériaux Jean Rouxel, IMN, F-44000 Nantes, France. E-mail: camille.latouche@univ-nantes.fr*

## Contents

|    |                                            |    |
|----|--------------------------------------------|----|
| 1  | Complex 10                                 | 2  |
| 2  | Complex 13                                 | 4  |
| 3  | Complex I1                                 | 6  |
| 4  | Complex I3                                 | 8  |
| 5  | Complex 1a                                 | 10 |
| 6  | Complex 2a                                 | 12 |
| 7  | Complex 2c                                 | 14 |
| 8  | Complex 3a                                 | 16 |
| 9  | Complex 3b                                 | 18 |
| 10 | Complex 4a                                 | 20 |
| 11 | Complex 4b                                 | 22 |
| 12 | Complex 5c                                 | 24 |
| 13 | Basis set impact                           | 26 |
| 14 | Absorption spectra of complex 1a           | 26 |
| 15 | Experimental and simulated phosphorescence | 26 |

# 1 Complex 10

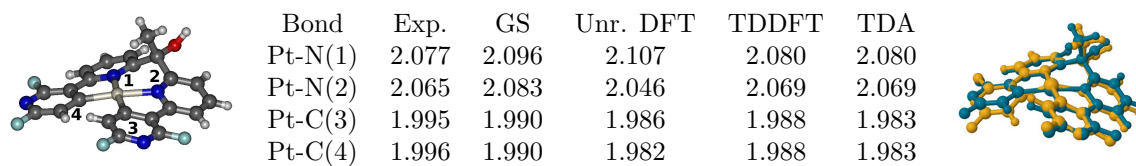

Fig-SI 1: Relaxed ground state structure (left) of **10**. Experimental[1] and computed relevant geometrical parameters (middle) around the metal centre in Å. Ground and excited (Unr. DFT) states superimposed geometries (right).

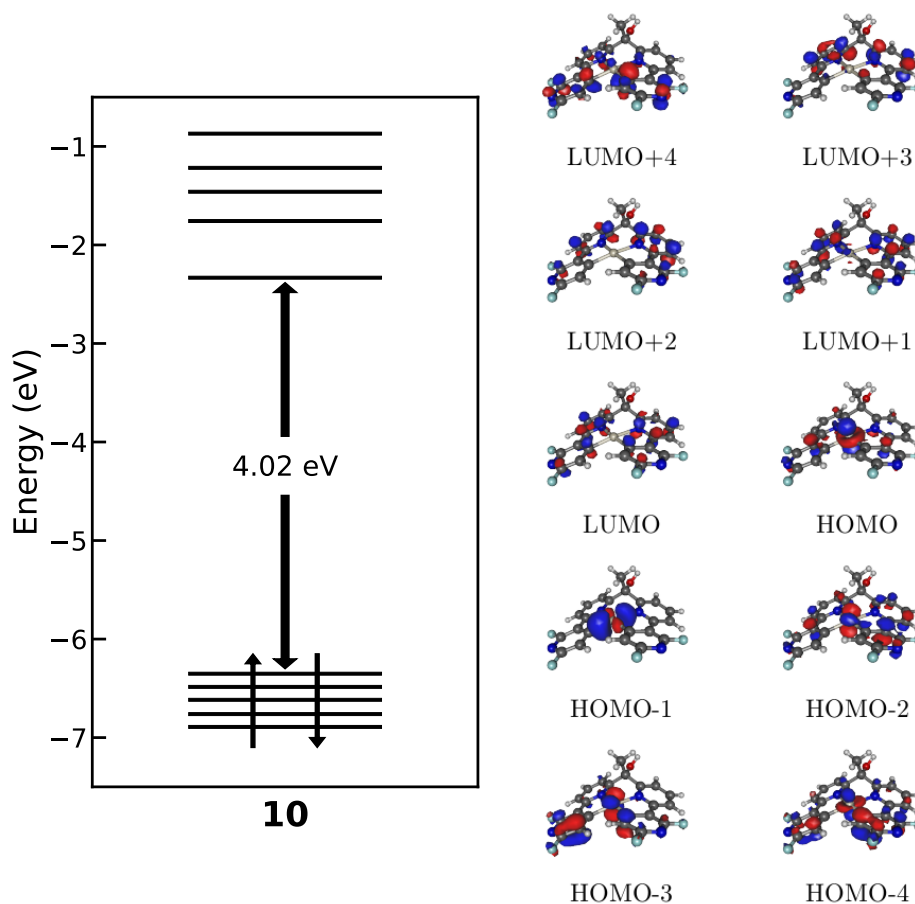

Fig-SI 2: Energetic diagram (left) and graphical representation of the frontier orbitals (right) of complex **10**.

| Exp. (eV) | TDDFT (eV) | Excitation assignments |
|-----------|------------|------------------------|
| 3.29      | 3.54       | HOMO-2 → LUMO          |
|           |            | HOMO-3 → LUMO          |
| 3.73      | 3.86       | HOMO → LUMO+1          |
|           |            | HOMO-3 → LUMO          |
|           |            | HOMO-1 → LUMO+1        |
| 4.05      | 3.93       | HOMO-4 → LUMO          |
|           |            | HOMO → LUMO+2          |
| 4.54      | 4.47       | HOMO-3 → LUMO+1        |
|           |            | HOMO-2 → LUMO+1        |
|           |            | HOMO-1 → LUMO+3        |

Table-SI 1: Experimental[1] and computed absorption energies and excitation assignments obtained on complex **10**.

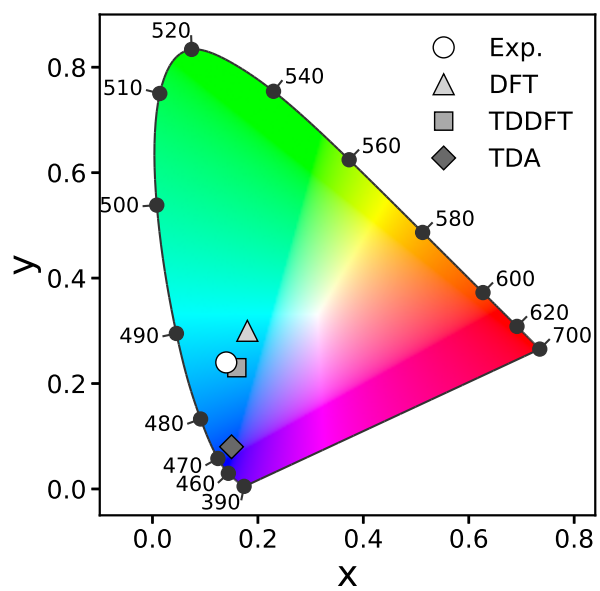

Fig-SI 3: Experimental[1] and computed (Unr. DFT, TDDFT and TDA) colour rendering of **10** over a CIE 1931 chromaticity horseshoe diagram.

## 2 Complex 13

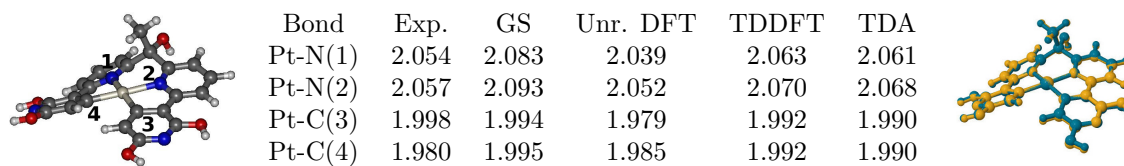

Fig-SI 4: Relaxed ground state structure (left) of **13**. Experimental[1] and computed relevant geometrical parameters (middle) around the metal centre in Å. Ground and excited (Unr. DFT) states superimposed geometries (right).

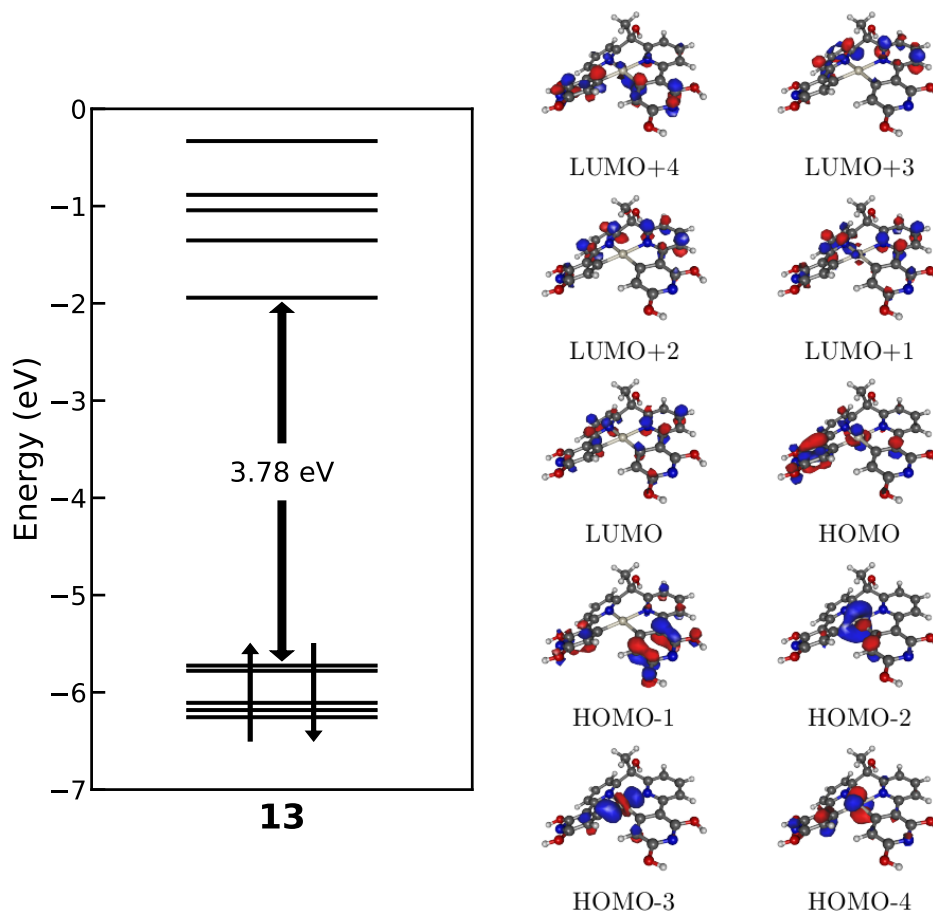

Fig-SI 5: Energetic diagram (left) and graphical representation of the frontier orbitals (right) of complex **13**.

| Exp. (eV) | TDDFT (eV) | Excitation assignments |
|-----------|------------|------------------------|
| 3.93      | 3.07       | HOMO → LUMO            |
|           |            | HOMO-2 → LUMO          |
| 3.49      | 3.56       | HOMO-4 → LUMO          |
|           |            | HOMO-3 → LUMO          |
|           |            | HOMO-2 → LUMO          |
|           |            | HOMO → LUMO+1          |
| 4.23      | 4.42       | HOMO-1 → LUMO+3        |
|           |            | HOMO-2 → LUMO+3        |
|           |            | HOMO-4 → LUMO+1        |
|           |            | HOMO-3 → LUMO+2        |

Table-SI 2: Experimental[1] and computed absorption energies and excitation assignments obtained on complex **13**.

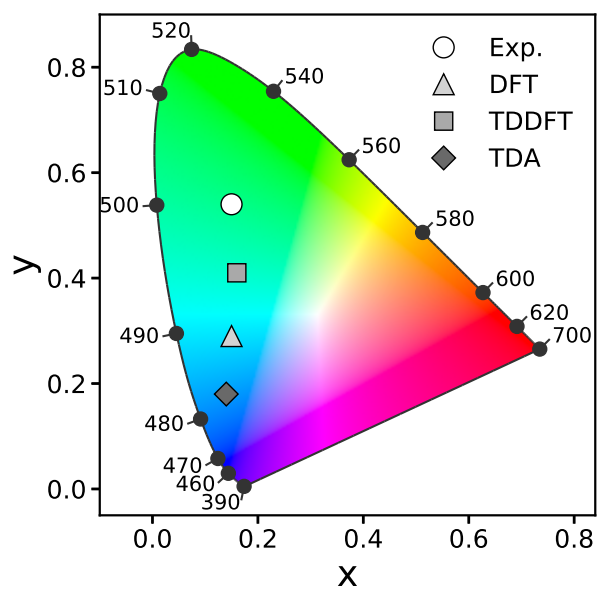

Fig-SI 6: Experimental[1] and computed (Unr. DFT, TDDFT and TDA) colour rendering of **13** over a CIE 1931 chromaticity horseshoe diagram.

### 3 Complex I1

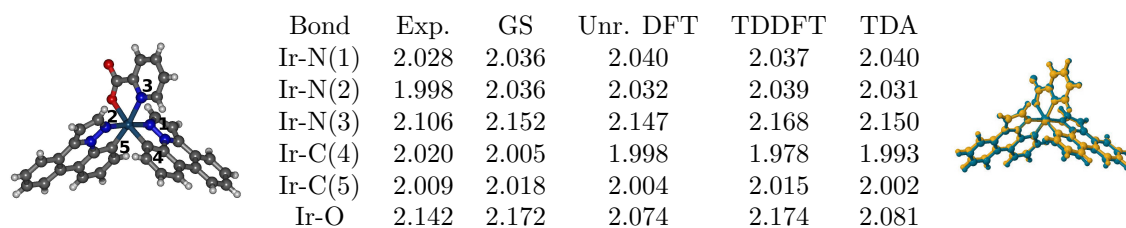

Fig-SI 7: Relaxed ground state structure (left) of **I1**. Experimental[2] and computed relevant geometrical parameters (middle) around the metal centre in Å. Ground and excited (Unr. DFT) states superimposed geometries (right).

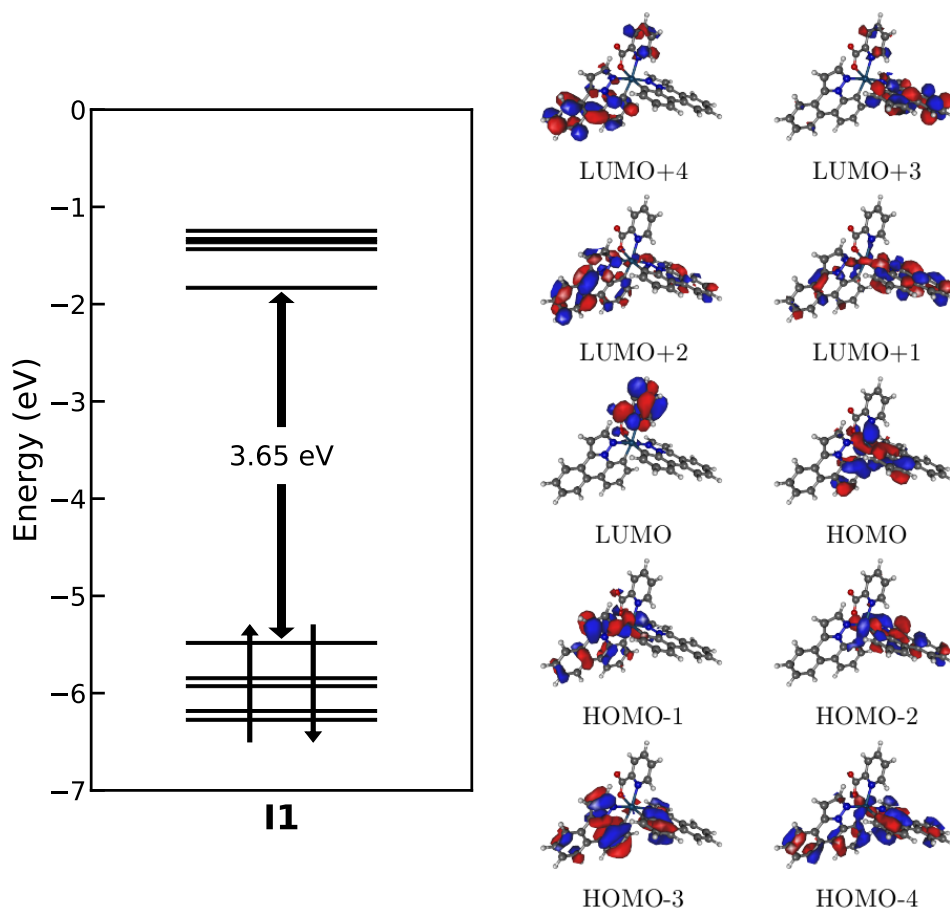

Fig-SI 8: Energetic diagram (left) and graphical representation of the frontier orbitals (right) of complex **I1**.

| Exp. (eV) | TDDFT (eV) | Excitation assignments |
|-----------|------------|------------------------|
| 3.58      | 3.39       | HOMO-1 → LUMO          |
| 4.47      | 4.29       | HOMO-4 → LUMO+1        |
|           |            | HOMO-3 → LUMO+4        |
|           |            | HOMO-4 → LUMO+2        |

Table-SI 3: Experimental[2] and computed absorption energies and excitation assignments obtained on complex **I1**.

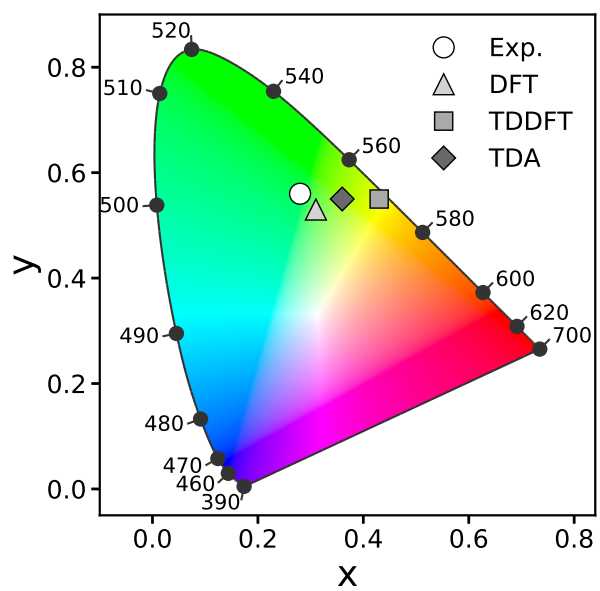

Fig-SI 9: Experimental[2] and computed (Unr. DFT, TDDFT and TDA) colour rendering of **I1** over a CIE 1931 chromaticity horseshoe diagram.

## 4 Complex I3

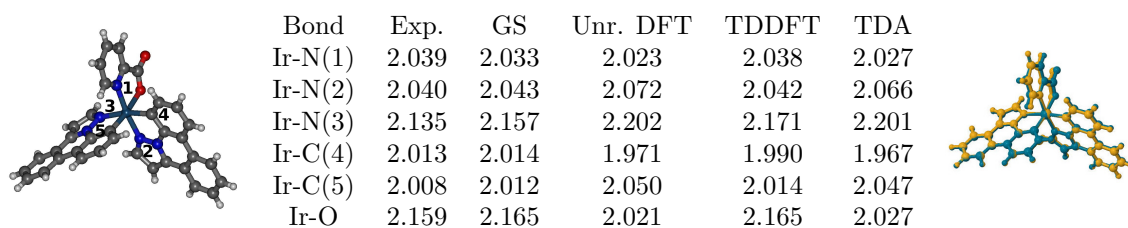

Fig-SI 10: Relaxed ground state structure (left) of **I3**. Experimental[2] and computed relevant geometrical parameters (middle) around the metal centre in Å. Ground and excited (Unr. DFT) states superimposed geometries (right).

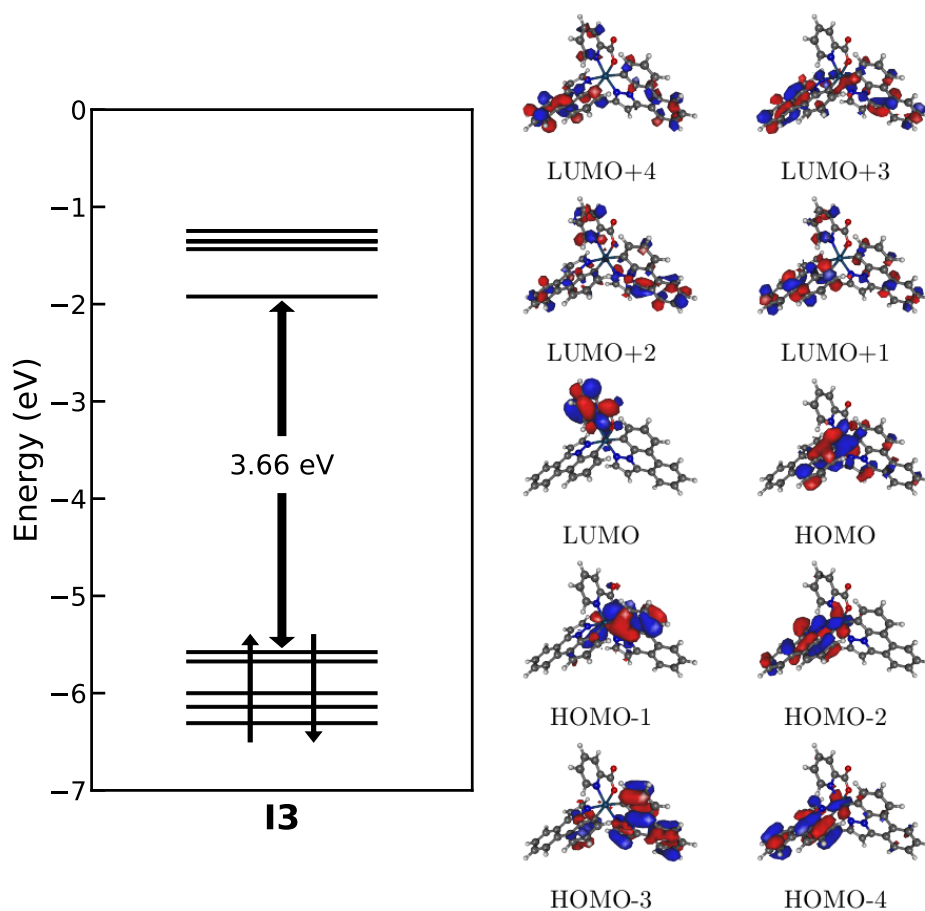

Fig-SI 11: Energetic diagram (left) and graphical representation of the frontier orbitals (right) of complex **I3**.

| Exp. (eV) | TDDFT (eV) | Excitation assignments |
|-----------|------------|------------------------|
| 3.56      | 3.46       | HOMO-2 → LUMO          |
| 4.58      | 4.58       | HOMO-4 → LUMO+4        |
|           |            | HOMO-3 → LUMO+7        |
|           |            | HOMO-5 → LUMO+1        |

Table-SI 4: Experimental[2] and computed absorption energies and excitation assignments obtained on complex **I3**.



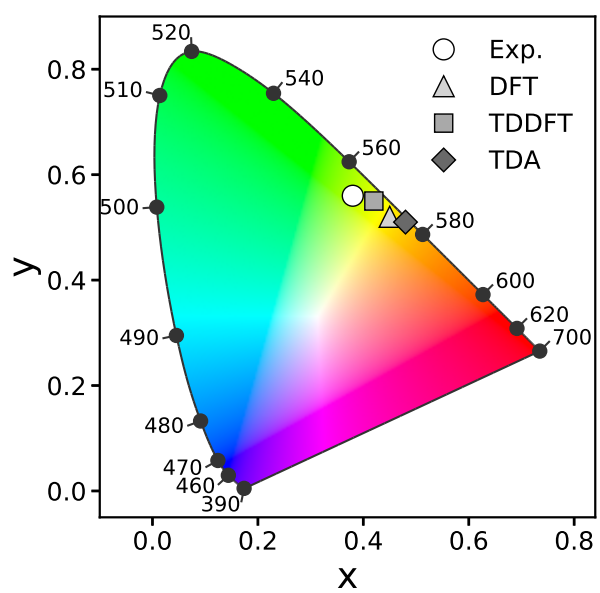

Fig-SI 12: Experimental[2] and computed (Unr. DFT, TDDFT and TDA) colour rendering of **13** over a CIE 1931 chromaticity horseshoe diagram.

## 5 Complex 1a

| Bond    | Exp.  | GS    | Unr. DFT | TDDFT | TDA   |
|---------|-------|-------|----------|-------|-------|
| Ir-P(1) | 2.307 | 2.358 | 2.375    | 2.367 | 2.376 |
| Ir-P(2) | 2.316 | 2.356 | 2.368    | 2.362 | 2.366 |
| Ir-N(3) | 2.056 | 2.068 | 2.058    | 2.060 | 2.059 |
| Ir-N(4) | 2.090 | 2.178 | 2.176    | 2.182 | 2.177 |
| Ir-C    | 2.055 | 2.039 | 2.011    | 2.028 | 2.014 |
| Ir-H    | 1.512 | 1.619 | 1.622    | 1.622 | 1.622 |

Fig-SI 13: Relaxed ground state structure (left) of **1a**. Experimental[3] and computed relevant geometrical parameters (middle) around the metal centre in Å. Ground and excited (Unr. DFT) states superimposed geometries (right).

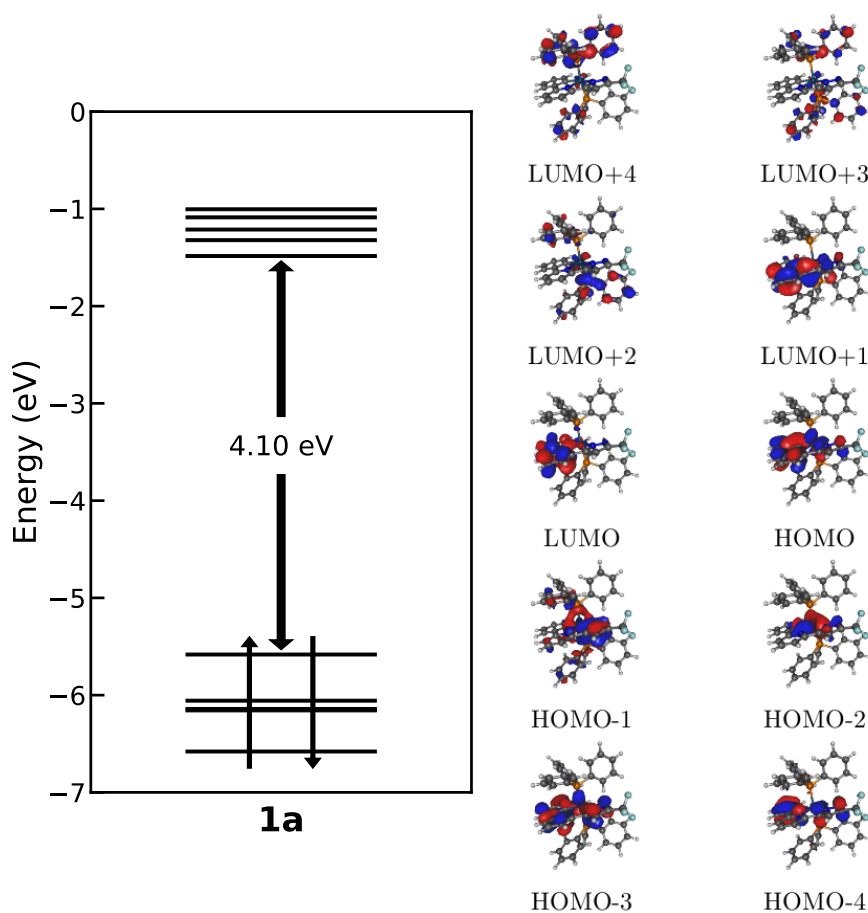

Fig-SI 14: Energetic diagram (left) and graphical representation of the frontier orbitals (right) of complex **1a**.

| Exp. (eV) | TDDFT (eV) | Excitation assignments |
|-----------|------------|------------------------|
| 3.15      | 3.32       | HOMO → LUMO            |
|           |            | HOMO → LUMO+1          |
| 3.63      | 3.67       | HOMO → LUMO+1          |
| 4.46      | 4.20       | HOMO-1 → LUMO+2        |
|           |            | HOMO → LUMO+5          |
|           |            | HOMO-2 → LUMO+2        |

Table-SI 5: Experimental[3] and computed absorption energies and excitation assignments obtained on complex **1a**.

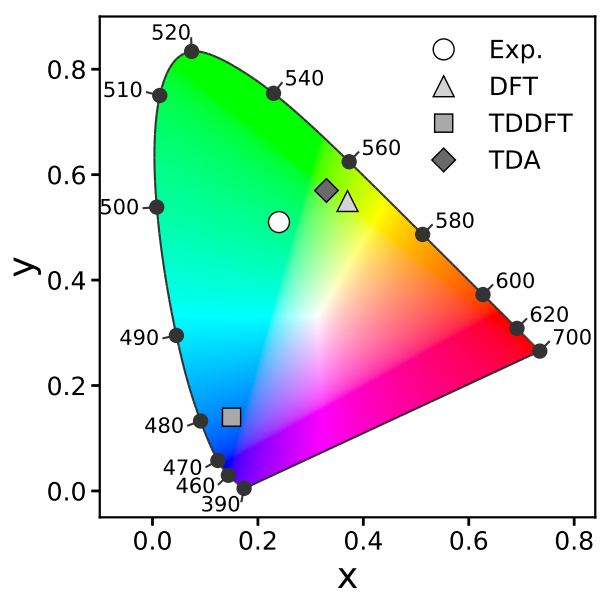

Fig-SI 15: Experimental[3] and computed (Unr. DFT, TDDFT and TDA) colour rendering of **1a** over a CIE 1931 chromaticity horseshoe diagram.

## 6 Complex 2a

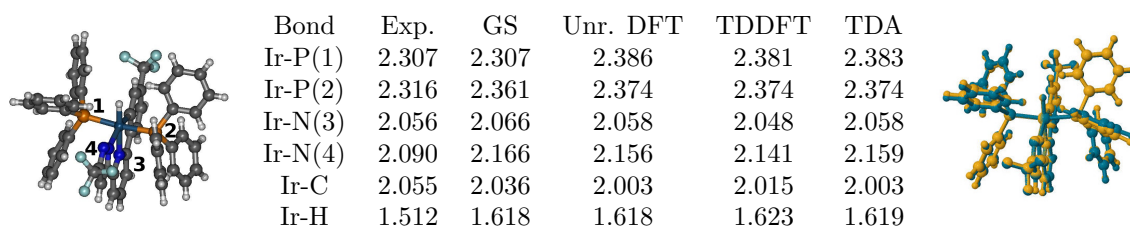

Fig-SI 16: Relaxed ground state structure (left) of **2a**. Experimental[3] and computed relevant geometrical parameters (middle) around the metal centre in Å. Ground and excited (Unr. DFT) states superimposed geometries (right).

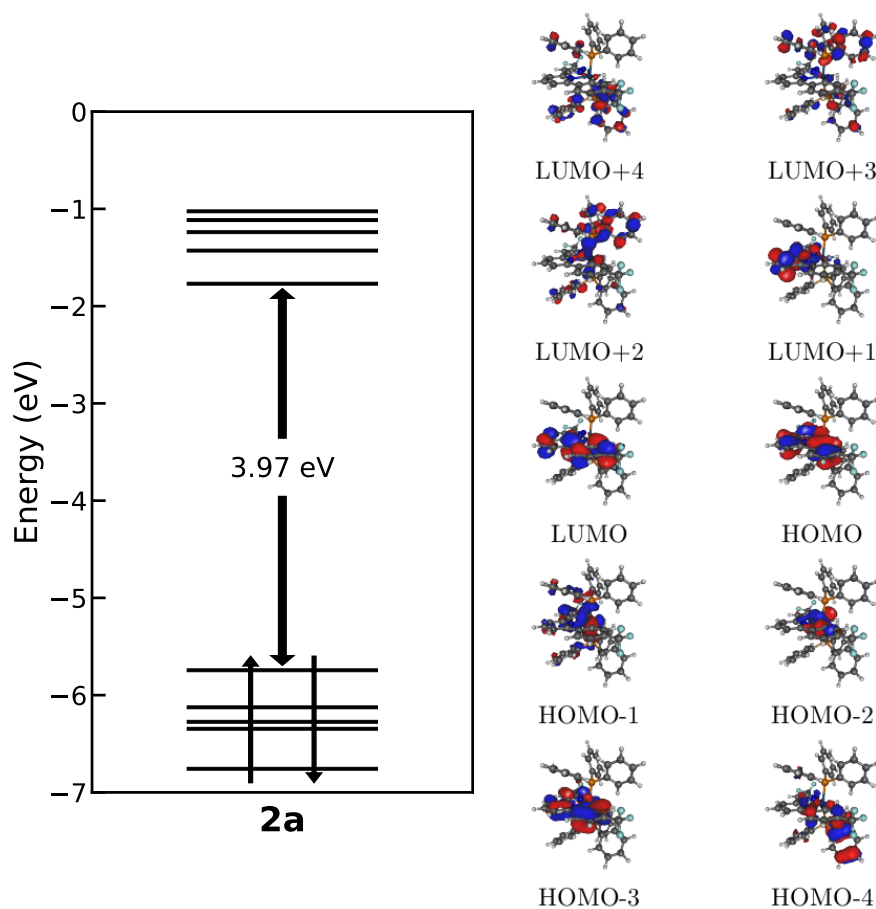

Fig-SI 17: Energetic diagram (left) and graphical representation of the frontier orbitals (right) of complex **2a**.

| Exp. (eV) | TDDFT (eV) | Excitation assignments |
|-----------|------------|------------------------|
| 3.05      | 3.25       | HOMO → LUMO            |
|           |            | HOMO → LUMO+1          |
| 3.66      | 3.76       | HOMO → LUMO+1          |
|           |            | HOMO-1 → LUMO          |
| 4.54      | 4.26       | HOMO-2 → LUMO+2        |
|           |            | HOMO-1 → LUMO+2        |

Table-SI 6: Experimental[3] and computed absorption energies and excitation assignments obtained on complex **2a**.

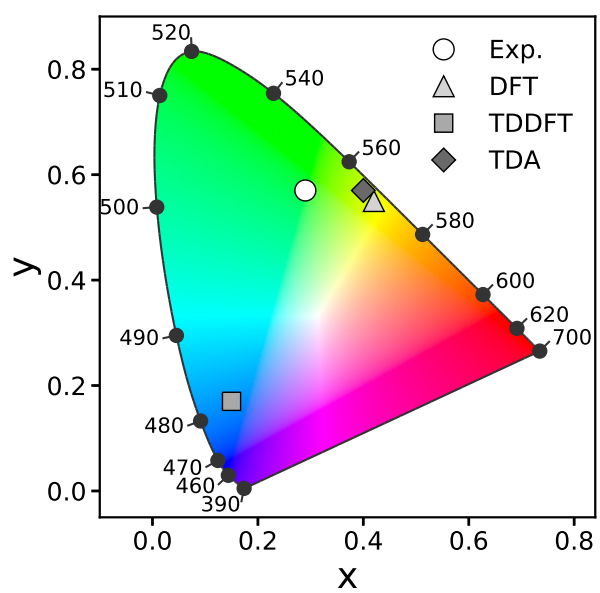

Fig-SI 18: Experimental[3] and computed (Unr. DFT, TDDFT and TDA) colour rendering of **2a** over a CIE 1931 chromaticity horseshoe diagram.

## 7 Complex 2c

| Bond    | Exp.  | GS    | Unr. DFT | TDDFT | TDA   |
|---------|-------|-------|----------|-------|-------|
| Ir-P(1) | 2.309 | 2.361 | 2.384    | 2.374 | 2.382 |
| Ir-P(2) | 2.318 | 2.360 | 2.381    | 2.373 | 2.382 |
| Ir-N(3) | 2.066 | 2.063 | 2.058    | 2.058 | 2.058 |
| Ir-N(4) | 2.123 | 2.149 | 2.143    | 2.149 | 2.143 |
| Ir-C    | 2.049 | 2.036 | 2.000    | 2.015 | 2.003 |
| Ir-H    | 1.473 | 1.619 | 1.620    | 1.620 | 1.620 |

Fig-SI 19: Relaxed ground state structure (left) of **2c**. Experimental[3] and computed relevant geometrical parameters (middle) around the metal centre in Å. Ground and excited (Unr. DFT) states superimposed geometries (right).

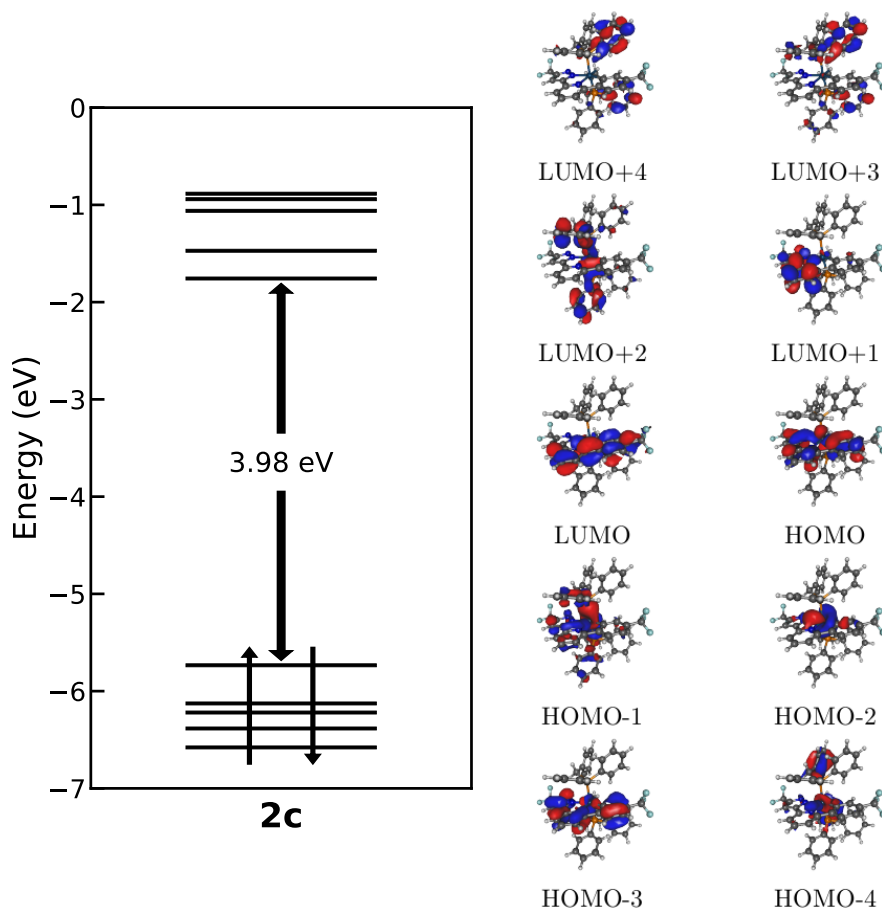

Fig-SI 20: Energetic diagram (left) and graphical representation of the frontier orbitals (right) of complex **2c**.

| Exp. (eV)         | TDDFT (eV) | Excitation assignments         |
|-------------------|------------|--------------------------------|
| 3.10 <sup>†</sup> | 3.24       | HOMO → LUMO<br>HOMO → LUMO+1   |
| 3.64              | 3.75       | HOMO-1 → LUMO<br>HOMO → LUMO+1 |
| 4.61              | 4.40       | HOMO-1 → LUMO+2                |

Table-SI 7: Experimental[3] and computed absorption energies and excitation assignments obtained on complex **2c**. <sup>†</sup> Approximately attributed from experimental spectra.

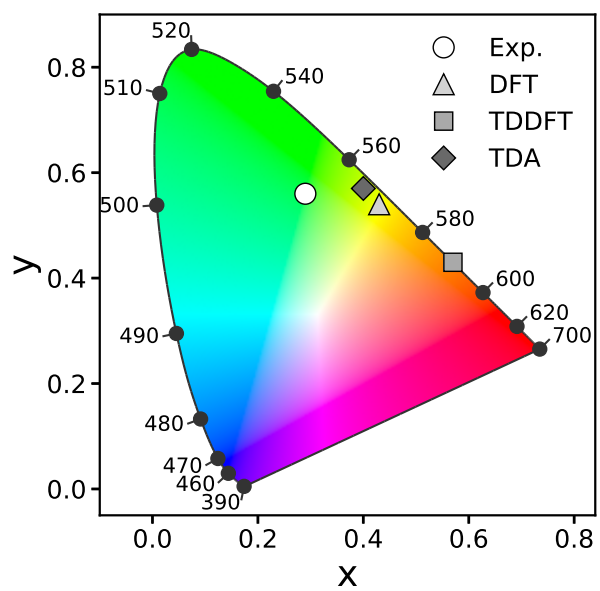

Fig-SI 21: Experimental[3] and computed (Unr. DFT, TDDFT and TDA) colour rendering of **2c** over a CIE 1931 chromaticity horseshoe diagram.

## 8 Complex 3a

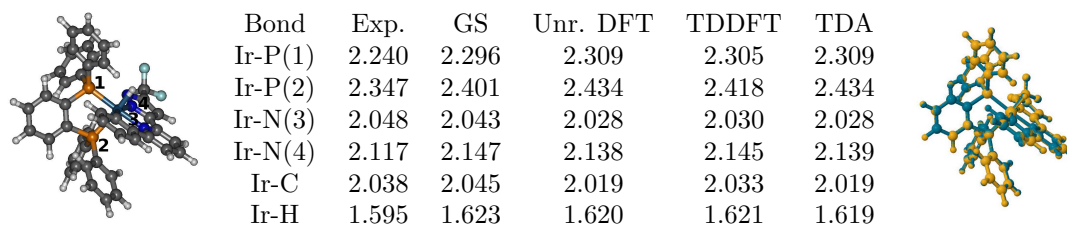

Fig-SI 22: Relaxed ground state structure (left) of **3a**. Experimental[3] and computed relevant geometrical parameters (middle) around the metal centre in Å. Ground and excited (Unr. DFT) states superimposed geometries (right).

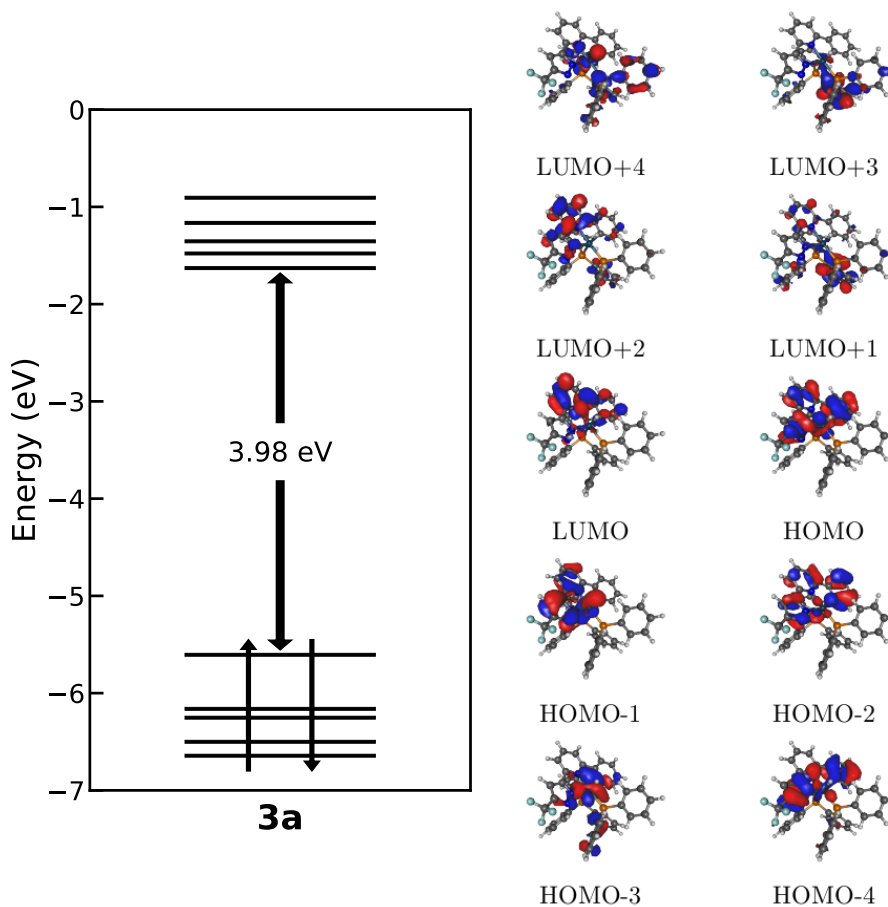

Fig-SI 23: Energetic diagram (left) and graphical representation of the frontier orbitals (right) of complex **3a**.

| Exp. (eV) | TDDFT (eV) | Excitation assignments |
|-----------|------------|------------------------|
| 3.12      | 3.17       | HOMO → LUMO            |
| 3.80      | 3.90       | HOMO-1 → LUMO          |
|           |            | HOMO → LUMO+3          |
| 4.61      | 4.56       | HOMO-4 → LUMO+1        |
|           |            | HOMO-4 → LUMO+2        |

Table-SI 8: Experimental[3] and computed absorption energies and excitation assignments obtained on complex **3a**.



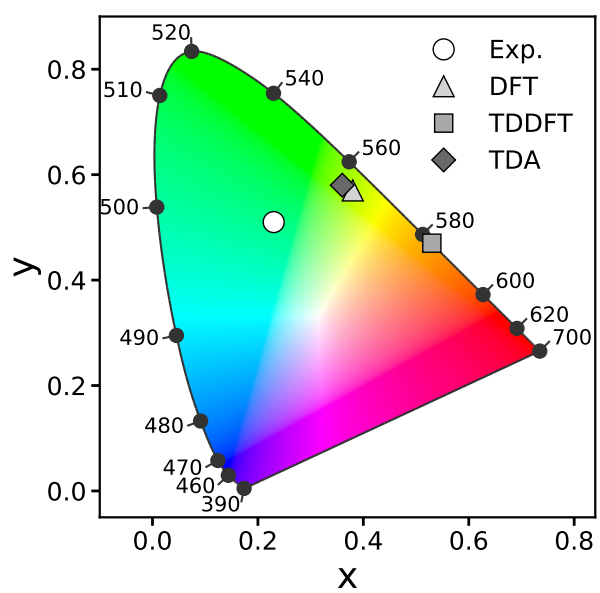

Fig-SI 24: Experimental[3] and computed (Unr. DFT, TDDFT and TDA) colour rendering of **3a** over a CIE 1931 chromaticity horseshoe diagram.

## 9 Complex 3b

| Bond    | Exp.  | GS    | Unr. DFT | TDDFT | TDA   |
|---------|-------|-------|----------|-------|-------|
| Ir-P(1) | 2.240 | 2.295 | 2.308    | 2.304 | 2.309 |
| Ir-P(2) | 2.347 | 2.406 | 2.452    | 2.426 | 2.444 |
| Ir-N(3) | 2.048 | 2.040 | 2.023    | 2.027 | 2.025 |
| Ir-N(4) | 2.117 | 2.144 | 2.129    | 2.143 | 2.135 |
| Ir-C    | 2.038 | 2.044 | 2.016    | 2.031 | 2.017 |
| Ir-H    | 1.595 | 1.622 | 1.615    | 1.619 | 1.617 |

Fig-SI 25: Relaxed ground state structure (left) of **3b**. Experimental[3] and computed relevant geometrical parameters (middle) around the metal centre in Å. Ground and excited (Unr. DFT) states superimposed geometries (right).

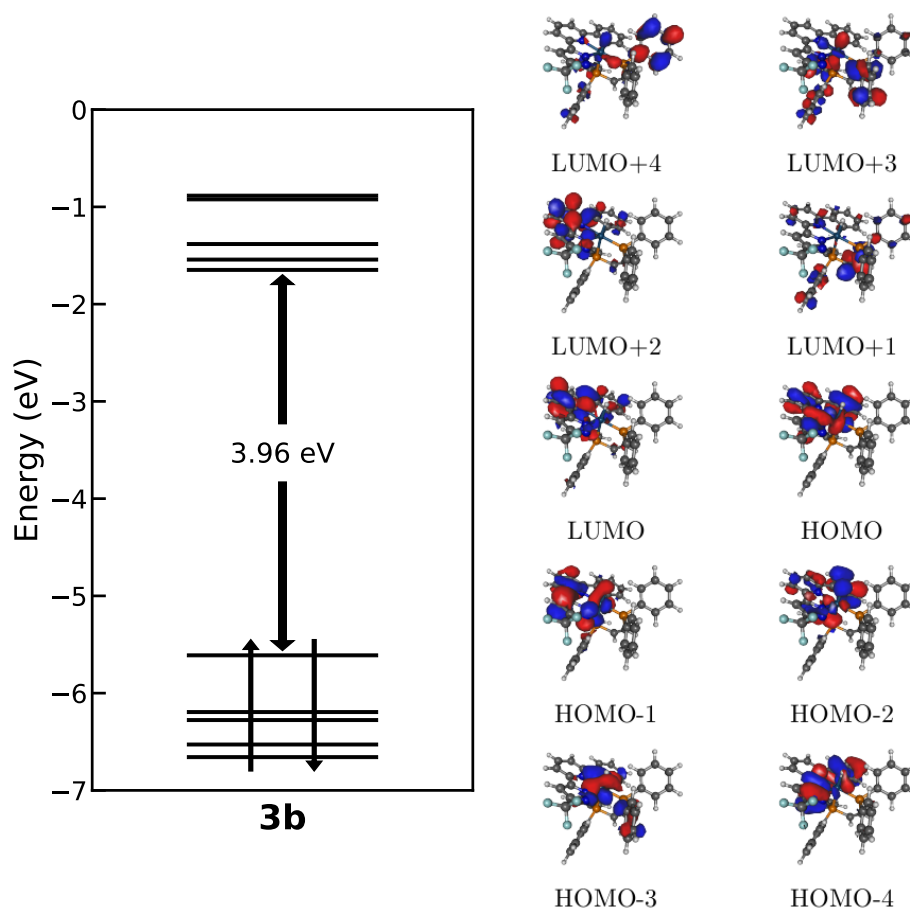

Fig-SI 26: Energetic diagram (left) and graphical representation of the frontier orbitals (right) of complex **3b**.

| Exp. (eV) | TDDFT (eV) | Excitation assignments |
|-----------|------------|------------------------|
| 3.09      | 3.17       | HOMO → LUMO            |
| 3.81      | 3.91       | HOMO-1 → LUMO          |

Table-SI 9: CExperimental[3] and computed absorption energies and excitation assignments obtained on complex **3b**.

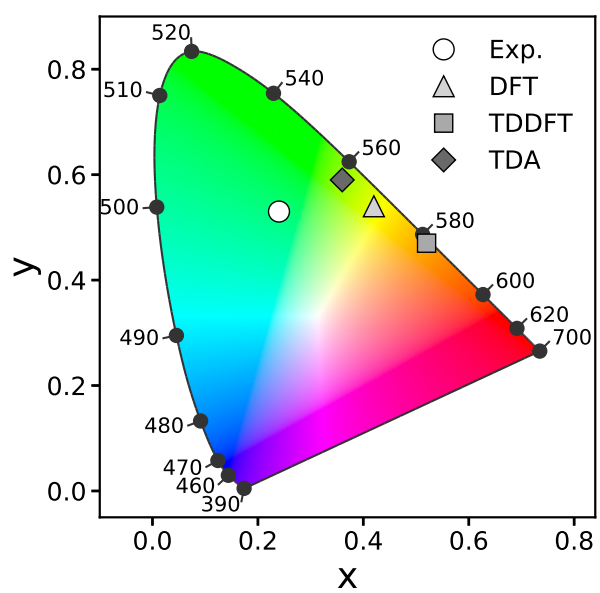

Fig-SI 27: Experimental[3] and computed (Unr. DFT, TDDFT and TDA) colour rendering of **3b** over a CIE 1931 chromaticity horseshoe diagram.

## 10 Complex 4a

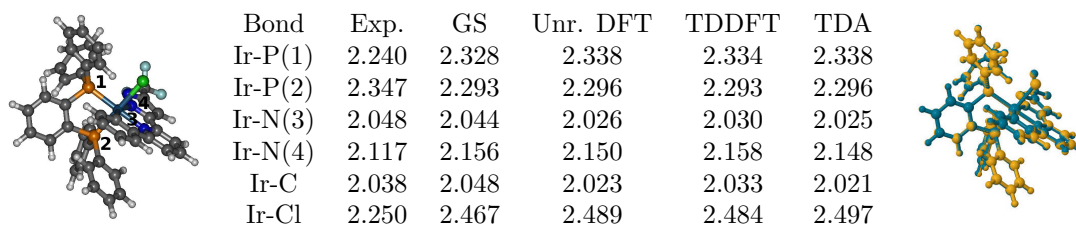

Fig-SI 28: Relaxed ground state structure (left) of **4a**. Experimental[3] and computed relevant geometrical parameters (middle) around the metal centre in Å. Ground and excited (Unr. DFT) states superimposed geometries (right).

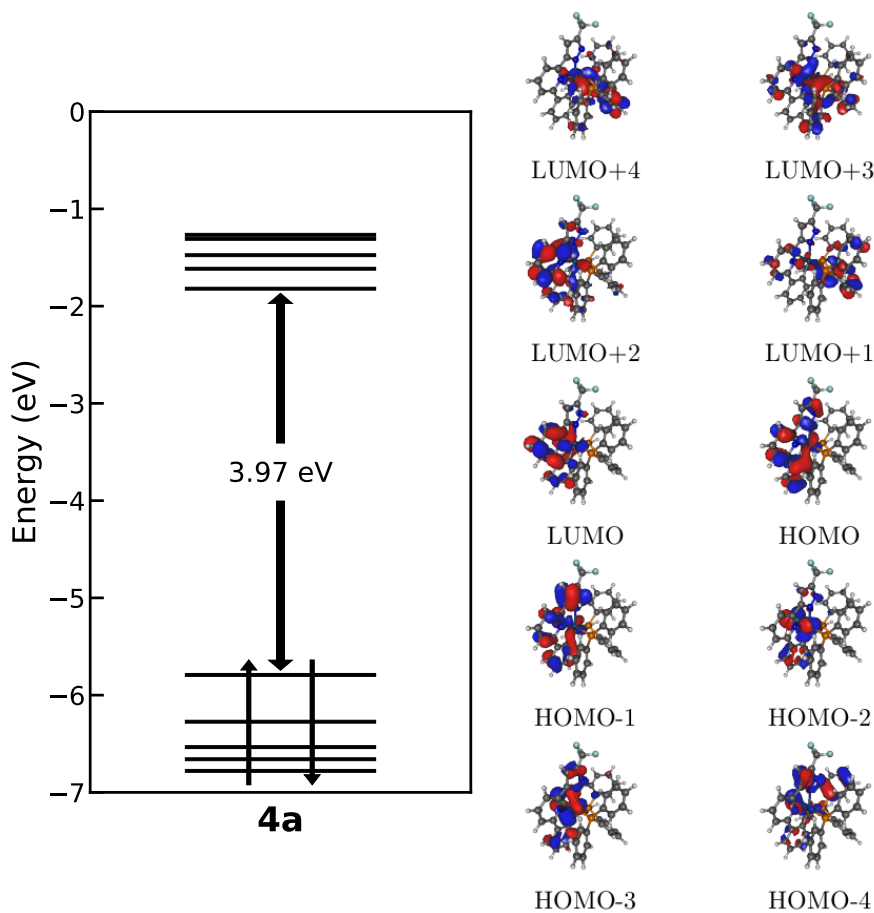

Fig-SI 29: Energetic diagram (left) and graphical representation of the frontier orbitals (right) of complex **4a**.

| Exp. (eV) | TDDFT (eV) | Excitation assignments |
|-----------|------------|------------------------|
| 3.06      | 3.15       | HOMO → LUMO            |
| 3.80      | 3.75       | HOMO-1 → LUMO          |
|           |            | HOMO → LUMO+3          |

Table-SI 10: Experimental[3] and computed absorption energies and excitation assignments obtained on complex **4a**.

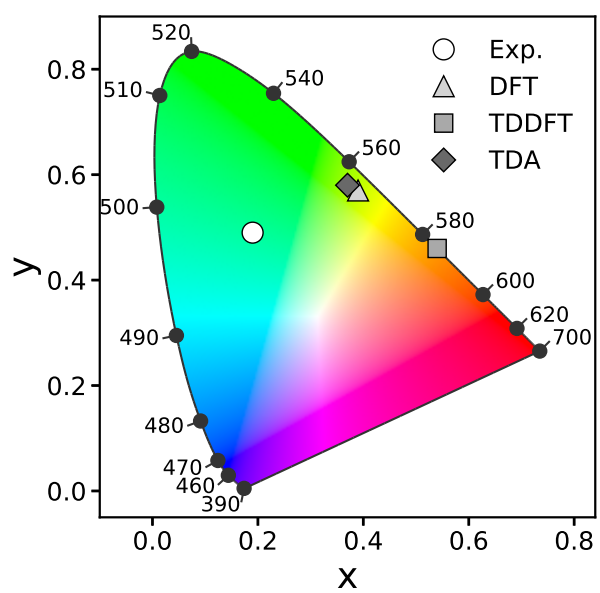

Fig-SI 30: Experimental[3] and computed (Unr. DFT, TDDFT and TDA) colour rendering of **4a** over a CIE 1931 chromaticity horseshoe diagram.

## 11 Complex 4b

|                                                                                   | Bond    | Exp.  | GS    | Unr. DFT | TDDFT | TDA   |                                                                                     |
|-----------------------------------------------------------------------------------|---------|-------|-------|----------|-------|-------|-------------------------------------------------------------------------------------|
| 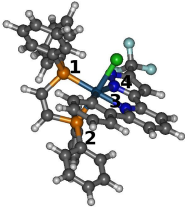 | Ir-P(1) | 2.240 | 2.326 | 2.337    | 2.332 | 2.338 |  |
|                                                                                   | Ir-P(2) | 2.347 | 2.295 | 2.299    | 2.296 | 2.300 |                                                                                     |
|                                                                                   | Ir-N(3) | 2.048 | 2.042 | 2.024    | 2.028 | 2.023 |                                                                                     |
|                                                                                   | Ir-N(4) | 2.117 | 2.152 | 2.146    | 2.155 | 2.144 |                                                                                     |
|                                                                                   | Ir-C    | 2.038 | 2.046 | 2.018    | 2.029 | 2.016 |                                                                                     |
|                                                                                   | Ir-Cl   | 2.250 | 2.467 | 2.493    | 2.486 | 2.506 |                                                                                     |

Fig-SI 31: Relaxed ground state structure (left) of **4b**. Experimental[3] and computed relevant geometrical parameters (middle) around the metal centre in Å. Ground and excited (Unr. DFT) states superimposed geometries (right).

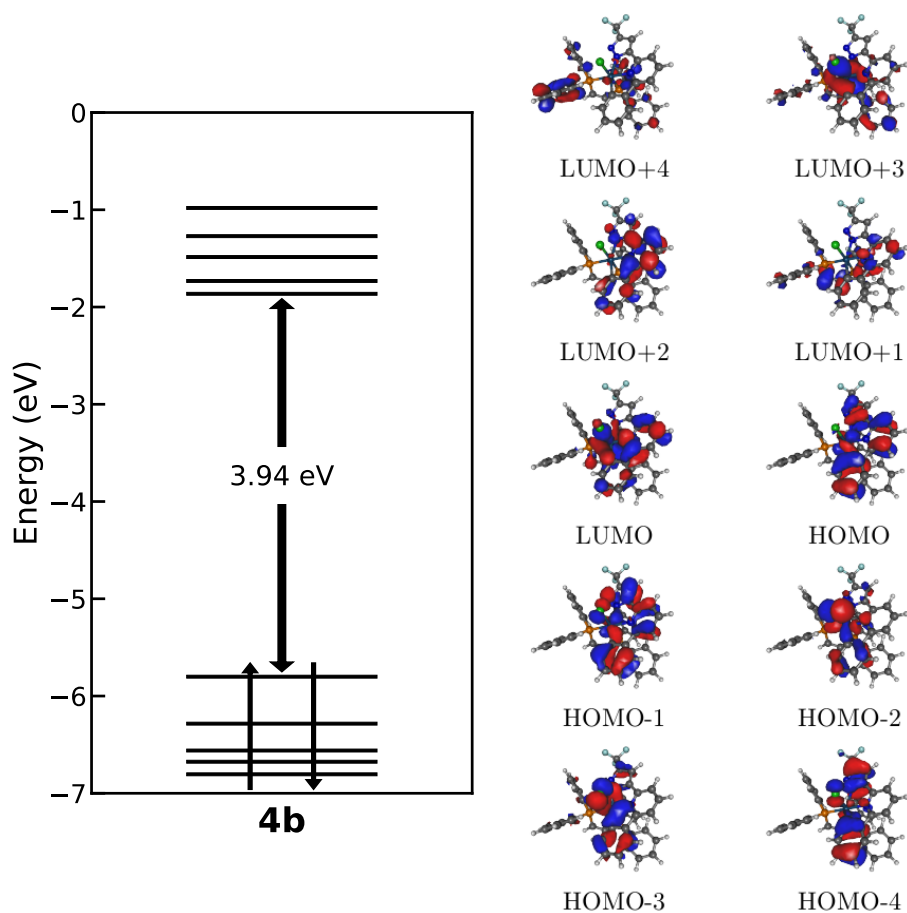

Fig-SI 32: Energetic diagram (left) and graphical representation of the frontier orbitals (right) of complex **4b**.

| Exp. (eV) | TDDFT (eV) | Excitation assignments           |
|-----------|------------|----------------------------------|
| 3.07      | 3.12       | HOMO → LUMO                      |
| 4.16      | 3.72       | HOMO-1 → LUMO+3<br>HOMO → LUMO+2 |

Table-SI 11: Experimental[3] and computed absorption energies and excitation assignments obtained on complex **4b**.

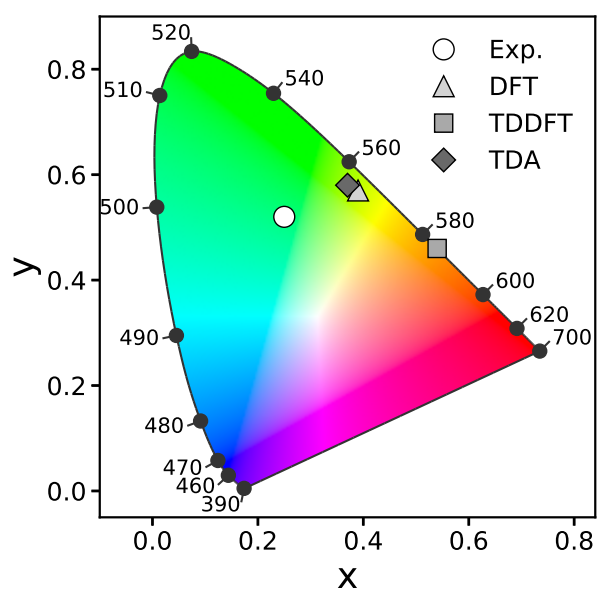

Fig-SI 33: Experimental[3] and computed (Unr. DFT, TDDFT and TDA) colour rendering of **4b** over a CIE 1931 chromaticity horseshoe diagram.

## 12 Complex 5c

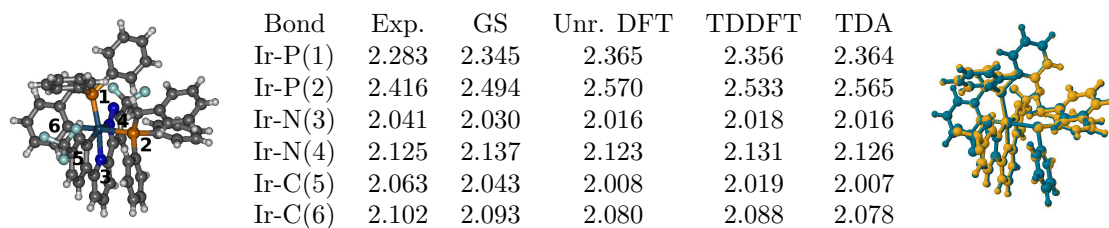

Fig-SI 34: Relaxed ground state structure (left) of **5c**. Experimental[3] and computed relevant geometrical parameters (middle) around the metal centre in Å. Ground and excited (Unr. DFT) states superimposed geometries (right).

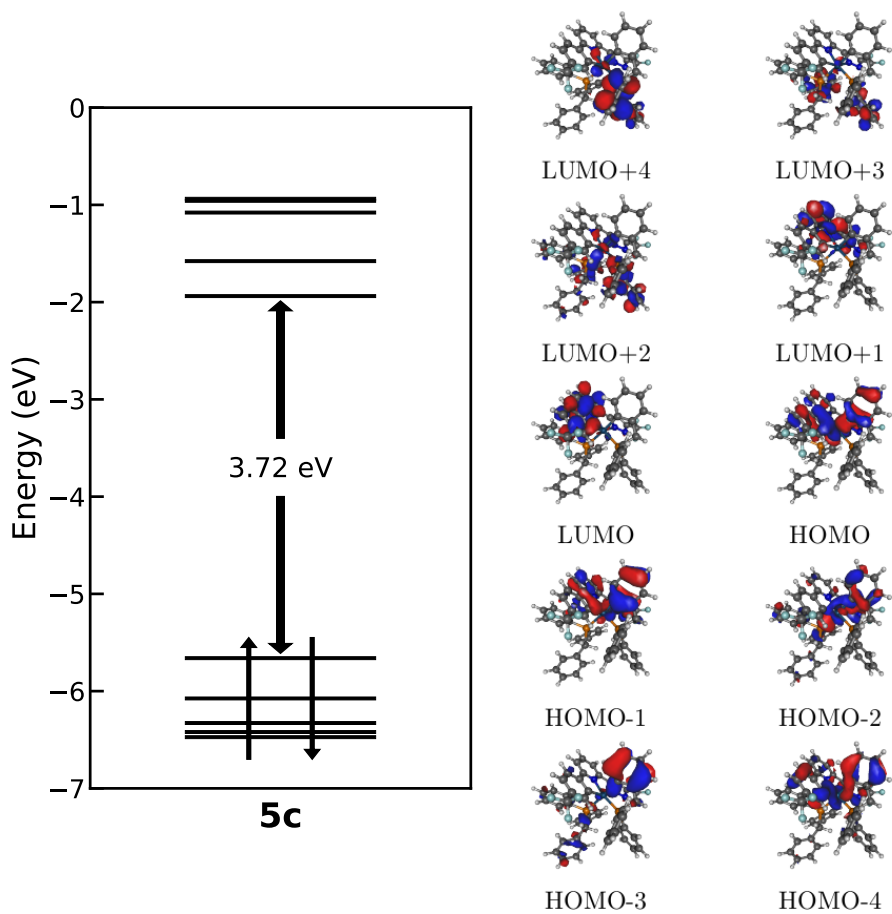

Fig-SI 35: Energetic diagram (left) and graphical representation of the frontier orbitals (right) of complex **5c**.

| Exp. (eV) | TDDFT (eV) | Excitation assignments |
|-----------|------------|------------------------|
| 2.95      | 2.96       | HOMO → LUMO            |
| 3.67      | 3.73       | HOMO-2 → LUMO          |

Table-SI 12: Experimental[3] and computed absorption energies and excitation assignments obtained on complex **5c**.



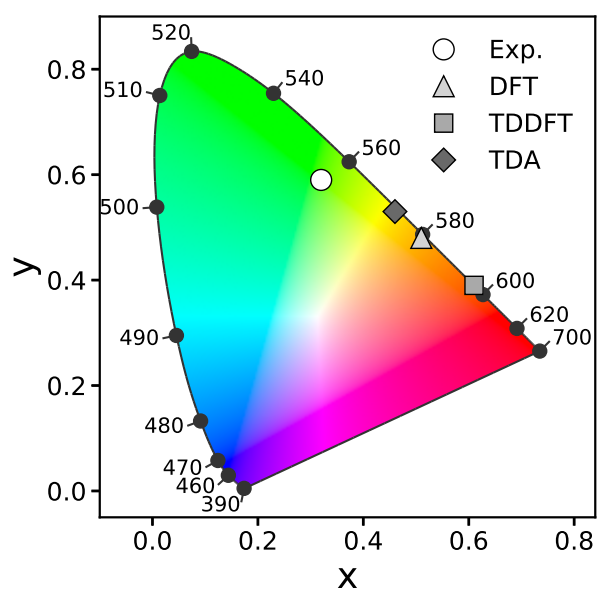

Fig-SI 36: Experimental[3] and computed (Unr. DFT, TDDFT and TDA) colour rendering of **5c** over a CIE 1931 chromaticity horseshoe diagram.

## 13 Basis set impact

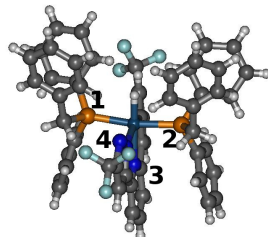

| Bond    | Exp.  | Ground State |       |       |
|---------|-------|--------------|-------|-------|
|         |       | A            | B     | C     |
| Ir-P(1) | 2.309 | 2.361        | 2.360 | 2.348 |
| Ir-P(2) | 2.318 | 2.360        | 2.359 | 2.348 |
| Ir-N(3) | 2.066 | 2.063        | 2.067 | 2.078 |
| Ir-N(4) | 2.123 | 2.149        | 2.149 | 2.161 |
| Ir-C    | 2.049 | 2.036        | 2.037 | 2.051 |
| Ir-H    | 1.473 | 1.619        | 1.605 | 1.610 |

  

| Bond    | Unr. DFT |       |       |
|---------|----------|-------|-------|
|         | A        | B     | C     |
| Ir-P(1) | 2.384    | 2.382 | 2.373 |
| Ir-P(2) | 2.381    | 2.382 | 2.368 |
| Ir-N(3) | 2.058    | 2.061 | 2.072 |
| Ir-N(4) | 2.143    | 2.141 | 2.161 |
| Ir-C    | 2.000    | 2.002 | 2.011 |
| Ir-H    | 1.620    | 1.606 | 1.611 |

Fig-SI 37: Relaxed ground and excited state structures of complex **2c** with respect to the basis set used together with relevant experimental data.[3] **A** refers to LANL2DZ+pol. (excepting H), **B** corresponds to LANL2DZ+pol. on all atoms and **C** is the Def2TZVP basis set.

## 14 Absorption spectra of complex 1a

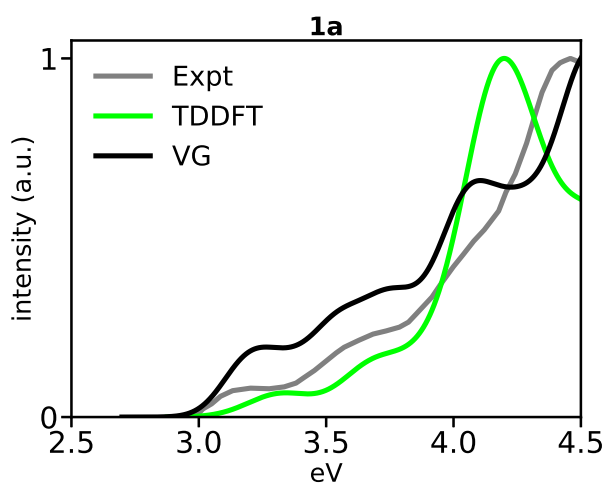

Fig-SI 38: Simulated and experimental absorption spectra of complex **1a** using TDDFT (green) and VG (black) model.[3]

## 15 Experimental and simulated phosphorescence

Table-SI 13: Experimental and simulated (electronic and vibronic) emission bands in eV together with the average and the mean absolute error (MAE) with respect to the highest energy band. [1, 2, 3], † Approximately attributed from experimental spectra.

|             | Exp.               | Unr. DFT |                         |                  | TDDFT               |       |                         | TDA              |                     |       |                         |                  |                     |
|-------------|--------------------|----------|-------------------------|------------------|---------------------|-------|-------------------------|------------------|---------------------|-------|-------------------------|------------------|---------------------|
|             |                    | Elec.    | $\Delta_{\text{Elec.}}$ | AH               | Δ <sub>AH</sub>     | Elec. | $\Delta_{\text{Elec.}}$ | AH               | Δ <sub>AH</sub>     | Elec. | $\Delta_{\text{Elec.}}$ | AH               | Δ <sub>AH</sub>     |
| <b>10</b>   | 2.66, 2.51         | 2.71     | 0.05                    | 2.66, 2.51       | 0.00, 0.00          | 2.58  | -0.08                   | 2.71, 2.55       | 0.05, 0.04          | 2.78  | 0.12                    | 2.87, 2.72       | 0.21, 0.21          |
| <b>13</b>   | 2.53, 2.41         | 2.76     | 0.23                    | 2.66, 2.51       | 0.13, 0.10          | 2.48  | -0.05                   | 2.58, 2.41       | 0.05, 0.00          | 2.59  | 0.06                    | 2.68, 2.52       | 0.15, 0.11          |
| <b>11</b>   | 2.37               | 2.64     | 0.27                    | 2.39             | 0.02                | 2.31  | -0.06                   | 2.29             | -0.08               | 2.17  | -0.20                   | 2.33             | -0.04               |
| <b>13</b>   | 2.28               | 2.49     | 0.21                    | 2.21             | -0.07               | 2.33  | 0.05                    | 2.31             | 0.03                | 1.86  | -0.42                   | 2.16             | -0.12               |
| <b>1a</b>   | 2.60, 2.42, 2.26   | 2.64     | 0.04                    | 2.53, 2.35, 2.20 | -0.07, -0.07, -0.06 | 2.65  | 0.05                    | 2.80, 2.64, 2.47 | 0.20, 0.22, 0.21    | 2.36  | -0.24                   | 2.51, 2.33, 2.17 | -0.09, -0.09, -0.09 |
| <b>2a</b>   | 2.54, 2.37, 2.22   | 2.53     | -0.01                   | 2.41, 2.23, 2.08 | -0.13, -0.14, -0.14 | 2.62  | 0.08                    | 2.76, 2.59, 2.43 | 0.22, 0.22, 0.21    | 2.24  | -0.30                   | 2.41, 2.23, 2.07 | -0.13, -0.14, -0.15 |
| <b>2c</b>   | 2.55, 2.37, 2.21   | 2.53     | -0.02                   | 2.43, 2.25, 2.10 | -0.12, -0.12, -0.11 | 2.01  | -0.54                   | 2.20, 2.02, 1.87 | -0.35, -0.35, -0.34 | 2.25  | -0.30                   | 2.41, 2.23, 2.07 | -0.14, -0.14, -0.14 |
| <b>3a</b>   | 2.59, 2.41, 2.27   | 2.58     | -0.01                   | 2.45, 2.27, 2.11 | -0.14, -0.14, -0.16 | 2.08  | -0.51                   | 2.24, 2.06, 1.90 | -0.35, -0.35, -0.37 | 2.31  | -0.28                   | 2.45, 2.27, 2.11 | -0.14, -0.14, -0.16 |
| <b>3b</b>   | 2.58, 2.41, 2.25   | 2.58     | 0.00                    | 2.47, 2.30, 2.16 | -0.11, -0.11, -0.09 | 2.09  | -0.49                   | 2.24, 2.07, 1.91 | -0.34, -0.34, -0.34 | 2.32  | -0.26                   | 2.45, 2.28, 2.12 | -0.13, -0.13, -0.13 |
| <b>4a</b>   | 2.59, 2.42, 2.27   | 2.58     | -0.01                   | 2.44, 2.27, 2.11 | -0.15, -0.15, -0.16 | 2.05  | -0.54                   | 2.23, 2.05, 1.89 | -0.36, -0.37, -0.38 | 2.30  | -0.29                   | 2.44, 2.26, 2.10 | -0.15, -0.16, -0.17 |
| <b>4b</b>   | 2.58, 2.41, 2.27 † | 2.58     | 0.00                    | 2.45, 2.27, 2.11 | -0.13, -0.14, -0.16 | 2.06  | -0.52                   | 2.23, 2.05, 1.89 | -0.35, -0.36, -0.38 | 2.30  | -0.28                   | 2.43, 2.26, 2.10 | -0.15, -0.15, -0.17 |
| <b>5c</b>   | 2.50, 2.33, 2.14   | 2.43     | -0.07                   | 2.32, 2.14, 2.04 | -0.18, -0.19, -0.10 | 1.96  | -0.54                   | 2.13, 1.96, 1.77 | -0.37, -0.37, -0.37 | 2.17  | -0.33                   | 2.31, 2.13, 1.97 | -0.19, -0.20, -0.17 |
| <b>Avg.</b> | -                  | -        | 0.06                    | -                | -0.08               | -     | -0.18                   | -                | -0.14               | -     | -0.23                   | -                | -0.08               |
| <b>MAE</b>  | -                  | -        | 0.08                    | -                | 0.10                | -     | 0.29                    | -                | 0.23                | -     | -0.26                   | -                | 0.14                |

## References

- [1] C. Lee, R. Zaen, K-M. Park, K H. Lee, J. Y. Lee, and Y. Kang. Blue phosphorescent platinum complexes based on tetradentate bipyridine ligands and their application to Organic Light-Emitting Diodes (OLEDs). *Organometallics*, 37(24):4639–4647, 2018.
- [2] W. Wei, S. A. M. Lima, P. I. Djurovich, A. Bossi, M. T. Whited, and M. E. Thompson. Synthesis and characterization of phosphorescent isomeric iridium complexes with a rigid cyclometalating ligand. *Polyhedron*, 140:138–145, 2018.
- [3] J-L. Liao, P. Rajakannu, S-H. Liu, G-H. Lee, P-T. Chou, A. K-Y. Jen, and Y. Chi. Iridium (III) complexes bearing tridentate chromophoric chelate: Phosphorescence fine-tuned by phosphine and hydride ancillary. *Inorganic chemistry*, 57(14):8287–8298, 2018.
